# Supplementary material
Source: Springer Nature journal article supplement (https://www.springermedizin.de/resource/supplementary/12882_2014_794_MOESM1_ESM.pdf/9454320)
Supplement: MOESM1 [file 9454320]

# Rice types consumed by CKDu patients and non-CKDu subjects as a percentage of total meals

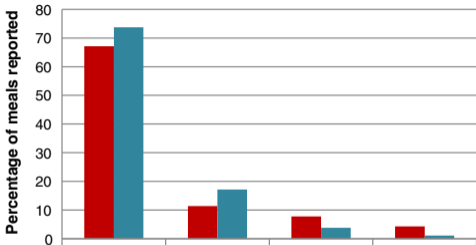

■ CKDu patients

■ Non-CKDu subjects

White raw rice

Parboiled rice

Red raw rice

Steamed rice

67.1

11.4

7.8

4.3

73.7

17.2

3.8

1.1
